# Supplementary material for: Detecting Tomato Leaf Curl New Delhi Virus Causing Ridge Gourd Yellow Mosaic Disease, and Other Begomoviruses by Antibody-Based Methods
Source: MDPI journal article supplement (doi:10.3390/plants12030490), 2023-01-20
Supplement: s1 [file s1]

**Table S1. Detection of ToLCNDV through DAC-ELISA with different dilutions of the polyclonal antibody ToLCNDV-Rg-CP-Pab**

| Sl. No | ToLCNDV-CP-Rg-Pab dilution | OD value at 405 nm<br>(Mean of 3 replicates) |                         |
|--------|----------------------------|----------------------------------------------|-------------------------|
|        |                            | Buffer $\pm$ SEM                             | ToLCNDV-CP-Rg $\pm$ SEM |
| 1      | 1:100                      | 0.53 $\pm$ 0.0243                            | 1.03 $\pm$ 0.0472       |
| 2      | 1:500                      | 0.42 $\pm$ 0.0147                            | 0.83 $\pm$ 0.0291       |
| 3      | 1:1000                     | 0.36 $\pm$ 0.0091                            | 0.77 $\pm$ 0.0194       |
| 4      | 1:2000                     | 0.30 $\pm$ 0.0046                            | 0.75 $\pm$ 0.0115       |
| 5      | 1:4000                     | 0.28 $\pm$ 0.0113                            | 0.68 $\pm$ 0.0275       |
| 6      | 1:8000                     | 0.25 $\pm$ 0.0115                            | 0.65 $\pm$ 0.0298       |
| 7      | 1:10000                    | 0.24 $\pm$ 0.0037                            | 0.64 $\pm$ 0.0098       |
| 8      | 1:20000                    | 0.22 $\pm$ 0.0038                            | 0.62 $\pm$ 0.0107       |
| 9      | 1:40000                    | 0.20 $\pm$ 0.0070                            | 0.55 $\pm$ 0.0193       |
| 10     | 1:80000                    | 0.20 $\pm$ 0.0070                            | 0.30 $\pm$ 0.0105       |
| 11     | 1:100000                   | 0.18 $\pm$ 0.0063                            | 0.25 $\pm$ 0.0088       |
| 12     | 1:200000                   | 0.15 $\pm$ 0.0053                            | 0.15 $\pm$ 0.0053       |
| 13     | Conjugate control          | 0.04 $\pm$ 0.0014                            | 0.06 $\pm$ 0.0021       |
| 14     | Substrate control          | 0.04 $\pm$ 0.0014                            | 0.05 $\pm$ 0.0018       |

**Table S2. Sensitivity of ToLCNDV-Rg-CP-Pab with different concentrations of antigen (ToLCNDV-Rg-CP) determined by DAC-ELISA technique**

| Antigen concentration<br>( $\mu$ g/ml) | OD value at 405 nm<br>(Mean of 3 replicates) |                   |
|----------------------------------------|----------------------------------------------|-------------------|
|                                        | Buffer                                       | ToLCNDV-CP-Rg     |
| 500                                    | 0.16 $\pm$ 0.0073                            | 1.34 $\pm$ 0.0614 |
| 250                                    | 0.15 $\pm$ 0.0053                            | 0.95 $\pm$ 0.0255 |
| 125                                    | 0.13 $\pm$ 0.0033                            | 0.75 $\pm$ 0.0075 |
| 60                                     | 0.13 $\pm$ 0.0020                            | 0.71 $\pm$ 0.0222 |
| 30                                     | 0.12 $\pm$ 0.0044                            | 0.30 $\pm$ 0.0121 |
| 15                                     | 0.12 $\pm$ 0.0050                            | 0.25 $\pm$ 0.0115 |
| 7.5                                    | 0.11 $\pm$ 0.0046                            | 0.22 $\pm$ 0.0094 |
| 3.75                                   | 0.10 $\pm$ 0.0046                            | 0.20 $\pm$ 0.0092 |
| 1.80                                   | 0.10 $\pm$ 0.0046                            | 0.10 $\pm$ 0.0046 |

**Table S3. Detection of ToLCNDV through DAC-ELISA with different dilutions of ToLCNDV-Rg-CP-Pab**

| Antibody dilution | OD value at 405 nm<br>(Mean of 3 replicates) |                     |                      |
|-------------------|----------------------------------------------|---------------------|----------------------|
|                   | Buffer control                               | Healthy ridge gourd | Infected ridge gourd |
| 1:100             | 0.60 ± 0.0274                                | 0.76 ± 0.0348       | 2.10 ± 0.0962        |
| 1:500             | 0.51 ± 0.0233                                | 0.63 ± 0.0280       | 1.51 ± 0.0691        |
| 1:1000            | 0.44 ± 0.0201                                | 0.59 ± 0.0270       | 1.22 ± 0.0559        |
| 1:2000            | 0.34 ± 0.0155                                | 0.50 ± 0.0229       | 1.11 ± 0.0508        |
| 1:4000            | 0.25 ± 0.0114                                | 0.42 ± 0.0192       | 1.31 ± 0.0600        |
| 1:8000            | 0.21 ± 0.0096                                | 0.44 ± 0.0201       | 0.90 ± 0.0412        |
| 1:10000           | 0.18 ± 0.0082                                | 0.37 ± 0.0169       | 0.85 ± 0.0389        |
| 1:20000           | 0.16 ± 0.0073                                | 0.25 ± 0.0114       | 0.68 ± 0.0311        |
| 1:40000           | 0.12 ± 0.0057                                | 0.22 ± 0.0101       | 0.30 ± 0.0137        |

**Table S4. Enzyme-linked immuno sorbent assay showing the reaction of samples from different hosts using ToLCNDV-Rg-CP-Pab**

| Sl. No. | Hosts                   | OD value at 405 nm<br>(Mean of 3 replications) |               |               |
|---------|-------------------------|------------------------------------------------|---------------|---------------|
|         |                         | Buffer                                         | Healthy       | Infected      |
| 1.      | Ridge gourd             | 0.25 ± 0.0115                                  | 0.30 ± 0.0137 | 1.41 ± 0.0646 |
| 2.      | Watermelon              | 0.25 ± 0.0115                                  | 0.29 ± 0.0133 | 0.79 ± 0.0362 |
| 3.      | Cucumber                | 0.25 ± 0.0115                                  | 0.29 ± 0.0133 | 0.97 ± 0.0445 |
| 4.      | Pumpkin (Yellow mosaic) | 0.25 ± 0.0115                                  | 0.28 ± 0.0128 | 0.84 ± 0.0385 |
| 5.      | Bitter gourd            | 0.25 ± 0.0115                                  | 0.31 ± 0.0142 | 1.21 ± 0.0554 |
| 6.      | Bottle gourd            | 0.25 ± 0.0115                                  | 0.40 ± 0.0183 | 1.05 ± 0.0481 |
| 7.      | Snake gourd             | 0.25 ± 0.0115                                  | 0.30 ± 0.0137 | 1.02 ± 0.0467 |
| 8.      | Pumpkin (Leaf curl)     | 0.25 ± 0.0115                                  | 0.26 ± 0.0119 | 0.94 ± 0.0312 |
| 9.      | Chilli                  | 0.25 ± 0.0115                                  | 0.23 ± 0.0105 | 0.27 ± 0.0124 |
| 10.     | Capsicum                | 0.25 ± 0.0115                                  | 0.23 ± 0.0105 | 0.26 ± 0.0119 |
| 11.     | Cow pea                 | 0.25 ± 0.0115                                  | 0.37 ± 0.0170 | 0.38 ± 0.0174 |
| 12.     | French bean             | 0.25 ± 0.0115                                  | 0.33 ± 0.0151 | 0.35 ± 0.0160 |

**Table S5. Validation of DAC-ELISA by detection of ToLCNDV in plant samples collected from various fields in South India**

| Sl. No. | Location                                                   | Detection Techniques |                                  |
|---------|------------------------------------------------------------|----------------------|----------------------------------|
|         |                                                            | PCR                  | DAC-ELISA<br>OD <sub>405nm</sub> |
| 1       | UHS Campus, Bagalkot, Karnataka                            | +                    | 0.984 ± 0.0451                   |
| 2       | Badami, taluk, Bagalkot district, Karnataka                | +                    | 0.725 ± 0.0332                   |
| 3       | Jamakhandi, Jamakhandi taluk, Bagalkot district, Karnataka | +                    | 0.813 ± 0.0373                   |
| 4       | Sanganakeri, Gokak taluk, Belagavi district                | +                    | 1.221 ± 0.0560                   |
| 5       | Athani, Athani taluk, Belagavi district                    | +                    | 1.214 ± 0.0556                   |
| 6       | Ghataprabha, Gokak taluk, Belagavi district                | +                    | 1.011 ± 0.0463                   |
| 7       | IIHR, Hesarghatta. Bengaluru, Karnataka                    | +                    | 1.234 ± 0.0565                   |
| 8       | Rajanakunte, Bengaluru north taluk,                        | +                    | 1.089 ± 0.0499                   |
| 9       | Doddaballapura, Bengaluru rural district, Karnataka        | +                    | 0.984 ± 0.0451                   |
| 10      | GKVK campus, Bengaluru, Karnataka                          | +                    | 0.725 ± 0.0332                   |
| 11      | Basapur, Navalagund, taluk, Karnataka                      | +                    | 0.913 ± 0.0418                   |
| 12      | Rajoor, Yelburga taluk, Karnataka                          | +                    | 0.721 ± 0.0330                   |
| 13      | Bhatrahalli, Kolar taluk, Karnataka                        | +                    | 1.412 ± 0.0647                   |
| 14      | Hallikere, Maddur taluk, Mandya district                   | +                    | 1.211 ± 0.0555                   |
| 15      | Sindhuvalli, Nanjangudu taluk, Mysore district, Karnataka  | +                    | 1.134 ± 0.0520                   |
| 16      | Koratakere, Sira taluk. Tumkur district, Karnataka         | +                    | 1.189 ± 0.0545                   |
| 17      | Muddebihal, Muddebihal taluk, Vijapura district, Karnataka | +                    | 1.211 ± 0.0555                   |
| 18      | Vijayapur, Vijayapur taluk, Vijapura district, Karnataka   | +                    | 1.134 ± 0.0520                   |
| 19      | Poragi, Hindupur taluk. Anthapur district, Andhra Pradesh  | +                    | 1.089 ± 0.0499                   |
| 20      | Bagalur, Hosur taluk. Salem district, Tamil Nadu           | +                    | 0.992 ± 0.0455                   |
| 21      | Healthy Control                                            | -                    | 0.200 ± 0.0153                   |
| 22      | Buffer control                                             | -                    | 0.380 ± 0.0252                   |

**Table S6. Primers used in the present study for amplification of ToLCNDV coat protein gene**

| Name of the Primer | Sequence (5'-3')                          | Restriction sites              | Product (nt) | Reference             |
|--------------------|-------------------------------------------|--------------------------------|--------------|-----------------------|
| CCP-F              | GCC(C/T)AT(G/A)TA(T/C)AG(A/G)AAGCC(A/C)AG | -                              | 575          | Wyatt and Brown, 1996 |
| CCP-R              | GG(A/G)TT(AGT)GA(G/A)GCATG(TAC)GTACATG    | -                              |              |                       |
| CP-F               | TACGGATCCATATGATGATGTCGAAGCGACCAGCA       | <i>Bam</i> HI and <i>Nde</i> I | 771          | Present Study         |
| CP-R               | TAGAAGCTTTTAATTTGTGACCGAATC               | <i>Hind</i> III                |              |                       |

\*Nucleotides in underline represent the *Bam*HI and *Nde*I restriction sites in the forward primer and *Hind*III restriction site in the reverse primer.

**Table S7. GenBank accession numbers of selected begomovirus sequences from database used in this study for analysis of DNA-A component and coat protein**

| Sl. No. | Name of the Begomoviruses                                                       | Acronym                        | Accession No. |
|---------|---------------------------------------------------------------------------------|--------------------------------|---------------|
| 1       | Tomato leaf curl New Delhi virus-[India:Karnataka:Belagavi:Ridge gourd:2014]    | ToLCNDV-[IN:Kar:Bel:Rid:14]    | -             |
| 2       | Tomato leaf curl New Delhi virus-[India:Karnataka:Chettahalli:Ridge gourd:2015] | ToLCNDV-[IN:Kar:Chel:Rid:15]   | KT426905      |
| 3       | Tomato leaf curl New Delhi virus-[India:New Delhi:Ridge gourd:2010]             | ToLCNDV-[IN:ND:Rid:10]         | HM989845      |
| 4       | Tomato leaf curl New Delhi virus-[Pakistan:Ridge gourd:2008]                    | ToLCNDV-[PK:Rid:08]            | EF620534      |
| 5       | Tomato leaf curl New Delhi virus-[Thailand:Cucumber:2007]                       | ToLCNDV-[TH:Cuc:07]            | AB330079      |
| 6       | Tomato leaf curl New Delhi virus-[Indonesia:Central Java:Cucumber:2008]         | ToLCNDV-[ID:Cen:Cuc:08]        | AB613825      |
| 7       | Tomato leaf curl New Delhi virus - [Bangladesh:Cucumber:2006]                   | ToLCNDV-[BG:cuc:06]            | EF450316      |
| 8       | Tomato leaf curl New Delhi virus - [India: New Delhi:Cucumbe:2012]              | ToLCNDV-[IN:ND:Cuc:12]         | KC545812      |
| 9       | Tomato leaf curl New Delhi virus-[India:New Delhi:Pumpkin:2006]                 | ToLCNDV-[IN:ND:Pum:06]         | JN129254      |
| 10      | Tomato leaf curl New Delhi virus-[India:New Delhi:Pumpkin:2006]                 | ToLCNDV-[IN:ND:Pum:06]         | AM286433      |
| 11      | Tomato leaf curl New Delhi virus - [India:New Delhi:Pumpkin 2:2005]             | ToLCNDV-[IN:ND:Pum2:05]        | AM286434      |
| 12      | Tomato leaf curl New Delhi virus-[Pakistan:Multan:Bitter gourd:2005]            | ToLCNDV-[PK:Mul:Bit:05]        | AM747291      |
| 13      | Tomato leaf curl New Delhi virus-[Thailand:Bottle gourd:2007]                   | ToLCNDV-[TH:Bot:07]            | AB368447      |
| 14      | Tomato leaf curl New Delhi virus-[India:TamilNadu:cucurbits:2014]               | ToLCNDV-[IN:TN:cuc:14]         | KM275598      |
| 15      | Tomato leaf curl New Delhi virus-[Thailand:Musk melon:2007]                     | ToLCNDV-[TH:Mus:07]            | AB368448      |
| 16      | Tomato leaf curl New Delhi virus-[India:Sponge gourd:2005]                      | ToLCNDV-[IN:Spo:05]            | AY939926      |
| 17      | Tomato leaf curl New Delhi virus-[Taiwan:Oriental melon:2007]                   | ToLCNDV-[TW:Ori:07]            | GU180095      |
| 18      | Tomato leaf curl New Delhi virus-[India:New Delhi:Ash gourd:2011]               | ToLCNDV-[IN:ND:Ash:11]         | JN208136      |
| 19      | Tomato leaf curl Palampur virus - [India:Uttarpradesh:Muskmelon:2015]           | ToLCPaIV-[IN:UP:MM:15]         | KY564204      |
| 20      | Tomato leaf curl Palampur virus - [India:Varanasi:Pumpkin:2008]                 | ToLCPaIV-[IN:Var:Pum:08]       | GQ225738      |
| 21      | Tomato leaf curl Palampur virus - [Pakistan:Faiziabad:Bittergourd:2010]         | ToLCPaIV-[Pak:Fai:BG:10]       | FN555137      |
| 22      | Tomato leaf curl Palampur virus - [Iran:Jiroft:Melon:2007]                      | ToLCPaIV-[IR:Jir:Mel:07]       | EU547683      |
| 23      | Tomato leaf curl Palampur virus - [Iran:Khash:W9P:Citrullus lanatus:2010]       | ToLCPaIV-[IR:Kha:W9P:Wat:10]   | JF501728      |
| 24      | Tomato leaf curl Palampur virus - [Iran:Jiroft:T69P:Cucumis sativus:2008]       | ToLCPaIV-[IR:Jir:T69P:Cuc:08]  | JQ825226      |
| 25      | Tomato leaf curl Palampur virus-[India:Allipur:Cucumber :2010]                  | ToLCPaIV-[IN:All:Cuc:10]       | HQ848383      |
| 26      | Tomato leaf curl Palampur virus - [Iran:Jiroft 8:T58P:Cucumber:2007]            | ToLCPaIV-[IR:Jir8:T58P:Cuc:08] | FJ660431      |
| 27      | Tomato leaf curl Palampur virus - [Iran:Jiroft 5:T51X:Cucumber:2007]            | ToLCPaIV-[IR:Jir5:T51X:Cuc:08] | FJ660432      |
| 28      | Tomato leaf curl Palampur virus - [Iran:Kerman:T8X:Cucumber:2007]               | ToLCPaIV-[IR:Ker:Cuc:07]       | FJ660433      |
| 29      | Tomato leaf curl Palampur virus - [Iran:Kahnooj:T9X:Cucumber:2007]              | ToLCPaIV-[IR:Kah:T9X:Cuc:07]   | FJ660434      |
| 30      | Tomato leaf curl Palampur virus - [Iran:Jiroft 4:T6X:Cucumber:2007]             | ToLCPaIV-[IR:Jir5:T6X:Cuc:08]  | FJ660436      |
| 31      | Tomato leaf curl Palampur virus - [Iran:Jiroft 9:T7X:Cucumber:2007]             | ToLCPaIV-[IR:Jir9:T7X:Cuc:08]  | FJ660437      |
| 32      | Tomato leaf curl Palampur virus - [Iran:Jiroft 1:T55X:Cucumber:2008]            | ToLCPaIV-[IR:Jir1:T55X:Cuc:08] | FJ660444      |
| 33      | Tomato leaf curl Palampur virus - [Iran:Jiroft:T13X:Cucumis melo:2006]          | ToLCPaIV-[IR:Jir:T13X:Me:06]   | JF501719      |
| 34      | Tomato leaf curl Palampur virus - [Iran:Jiroft:T61X:Cucumber:2008]              | ToLCPaIV-[IR:Jir:T61X:Cuc:08]  | JF501723      |
| 35      | Tomato leaf curl Palampur virus - [Iran:Jiroft:T5X: Cucumber:2007]              | ToLCPaIV-[IR:Jir:T5X:Cuc:07]   | JF501724      |
| 36      | Tomato leaf curl Palampur virus - [Iran:Iranshahr:M4P:Cucumis melo:2009]        | ToLCPaIV-[IR:Ira:M4P:Mel:09]   | JF501725      |
| 37      | Tomato leaf curl Palampur virus - [Iran:Jiroft:K1P:Cucurbita pepo:2009]         | ToLCPaIV-[IR:Jir:K1P:Squ:09]   | JF501727      |
| 38      | Tomato leaf curl Palampur virus - [India:Palampur:Pumpkin:2008]                 | ToLCPaIV-[IN:Var:Pum:08]       | FJ931537      |
| 39      | Squash leaf curl China virus-[China:Squash:2003]                                | SLCCNV-[CH:Squ:03]             | AB027465      |
| 40      | Squash leaf curl China virus-[Vietnam:Squash:2004]                              | SLCCNV-[VN:Squ:04]             | AF509743      |
| 41      | Squash leaf curl China virus-[Vietnam:Squash:2004]                              | SLCCNV-[VN:Squ:04]             | AF509741      |
| 42      | Squash leaf curl China virus-[India:Coimbatore:Pumpkin:2004]                    | SLCCNV-[IN:Coi:Pum:04]         | AY184487      |
| 43      | Squash leaf curl China virus-[India:Lucknow:Pumpkin:2004]                       | SLCCNV-[IN:Luc:Pum:04]         | DQ026296      |
| 44      | Squash leaf curl China virus-[India:Varanasi:Pumpkin:2004]                      | SLCCNV-[IN:Var:Pum:04]         | EU573715      |
| 45      | Squash leaf curl Philippines virus-[Philippines:Pumpkin:2008]                   | SLCPHV-[PH:Pum:08]             | AB085793      |
| 46      | Squash leaf curl Philippines virus-[Taiwan:Pumpkin:2005]                        | SLCPHV-[TW:Pum:05]             | DQ866135      |
| 47      | Squash leaf curl China virus-[Pakistan:Lahore:Zucchini:2004]                    | SLCCNV-[PK:Lah:Zuc:04]         | AM286794      |
| 48      | Chilli leaf curl-[Oman:Tomato:2016]                                             | ChiLCV -[OM:Tom:16]            | HE806437      |
| 49      | Chilli leaf curl-[Oman:Tomato:2014]                                             | ChiLCV -[OM:Tom:14]            | KF229718      |
| 50      | Chilli leaf curl-[India:Gujarat:Gandhinagar:Chilli:2014]                        | ChiLCV-[IN:Gj:Gan:Chi:14]      | KM880103      |

|    |                                                                             |                             |          |
|----|-----------------------------------------------------------------------------|-----------------------------|----------|
| 51 | Chilli leaf curl-[Oman:Watermelon:2017]                                     | ChiLCV -[OM:WM:17]          | KX787939 |
| 52 | Chilli leaf curl-[Oman:Salalah:Petumia:2012]                                | ChiLCV -[OM:Sal:Pet:12]     | HF968755 |
| 53 | Chilli leaf curl-[Oman:Salalah:Petumia:2014]                                | ChiLCV -[OM:Sal:Pet:13]     | HF968756 |
| 54 | Chilli leaf curl-[Oman:Barka:Tomato:2014]                                   | ChiLCV -[OM:Bar:Tom:14]     | LN680633 |
| 55 | Chilli leaf curl-[Oman:Barka:Chilli:2013]                                   | ChiLCV -[OM:Bar:Chi:13]     | HG969263 |
| 56 | Chilli leaf curl-[Oman:Barka:Chilli:2016]                                   | ChiLCV -[OM:Bar:Chi:16]     | HG969264 |
| 57 | Chilli leaf curl-[Oman:Barka:Chilli:2016]                                   | ChiLCV -[OM:Bar:Chi:16]     | HG969265 |
| 58 | Chilli leaf curl-[India:Haryana:Sonipat:Mint:2015]                          | ChiLCV-[IN:HR:Sont:Mint:15] | KM921669 |
| 59 | Chilli leaf curl-[Oman:Barka:Tomato:2016]                                   | ChiLCV -[OM:Bar:Tom:16]     | HG969200 |
| 60 | Mung bean yellow mosaic virus [India:New Delhi:Urdbean:2011]                | MYMV-[IN:ND:Urd:11]         | JQ398669 |
| 61 | Mung bean yellow mosaic virus [India:TamilNadu:Madhurai:Beans:2015]         | MYMV-[IN:TN:Mad:Bean:15]    | AJ132575 |
| 62 | Mung bean yellow mosaic virus [India:TamilNadu:Blackgram:2016]              | MYMV-[IN:TN:Bg:16]          | KP784665 |
| 63 | Mung bean yellow mosaic virus [Pakistan:Faizalabad:Mungbean:2013]           | MYMV-[PK:FZ:Mung:13]        | FM208836 |
| 64 | Mung bean yellow mosaic virus [India:Uttarpradesh:Varanasi:Frenchbean:2011] | MYMV-[IN:UP:Var:Fre:11]     | KC019303 |
| 65 | Mung bean yellow mosaic virus [India:Uttarpradesh:Varanasi:Frenchbean:2011] | MYMV-[IN:UP:Var:Fre:11]     | KC019304 |
| 66 | Mung bean yellow mosaic virus [India:New Delhi:Cow pea:2003]                | MYMV-[IN:ND:Cow:03]         | AF481865 |
| 67 | Mung bean yellow mosaic virus [India:New Delhi:Frenchbean:2002]             | MYMV-[IN:ND:Fre:02]         | AY099066 |
| 68 | Mung bean yellow mosaic virus [India:Uttarpradesh:Kanpur:Freanbean:2010]    | MYMV-[IN:UP:Kan:Fre:10]     | GU591171 |
| 69 | Mungbean yellow mosaic India virus - [India:Varanasi:Dolichos:2005]         | MYMV-[IN:Var:Dlo:05]        | AY547317 |
| 70 | Mungbean yellow mosaic India virus - [India: New Delhi:Pigeonpea:2017]      | MYMV-[IN:ND:PP:07]          | KX363947 |
| 71 | Mungbean yellow mosaic India virus - [India: Assam:Guwahati:Cowpea:2017]    | MYMV-[IN:AS:Guw:Cow:17]     | KY556679 |

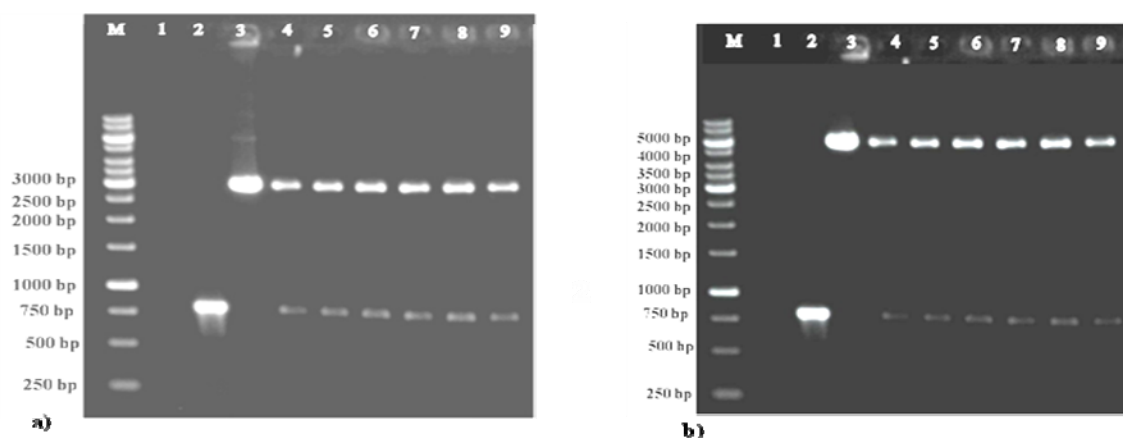

**Figure S1.** Agarose gel photograph showing restriction digestion of recombinant pBluescript IKS(+)-ToLCNDV-Rg isolate-CP with *Bam*HI and *Hind*III restriction endonucleases (a) and Restriction digestion of recombinant pET22-NH-ToLCNDV-Rg-CP with *Nde*I and *Hind*III restriction endonucleases (b). a) Lane M: 1kb DNA marker, Lane 1:Water control; Lane 2:Positive control; Lane 3:Undigested pBluescriptIKS(+)-ToLCNDV-CP-Rg; Lanes 4-9:*Bam*HI and *Hind*III restricted recombinant plasmid (pBluescriptIKS(+)-ToLCNDV-CP-Rg); b) Lane M: 1 Kb DNA marker; Lane 1:Water control; Lane 2:Positive control; Lane 3:Undigested pET22-NH-ToLCNDV-CP-Rg; Lanes 4-9:*Nde*I and *Hind*III digested recombinant plasmid pET22-NH-ToLCNDV-CP-Rg.

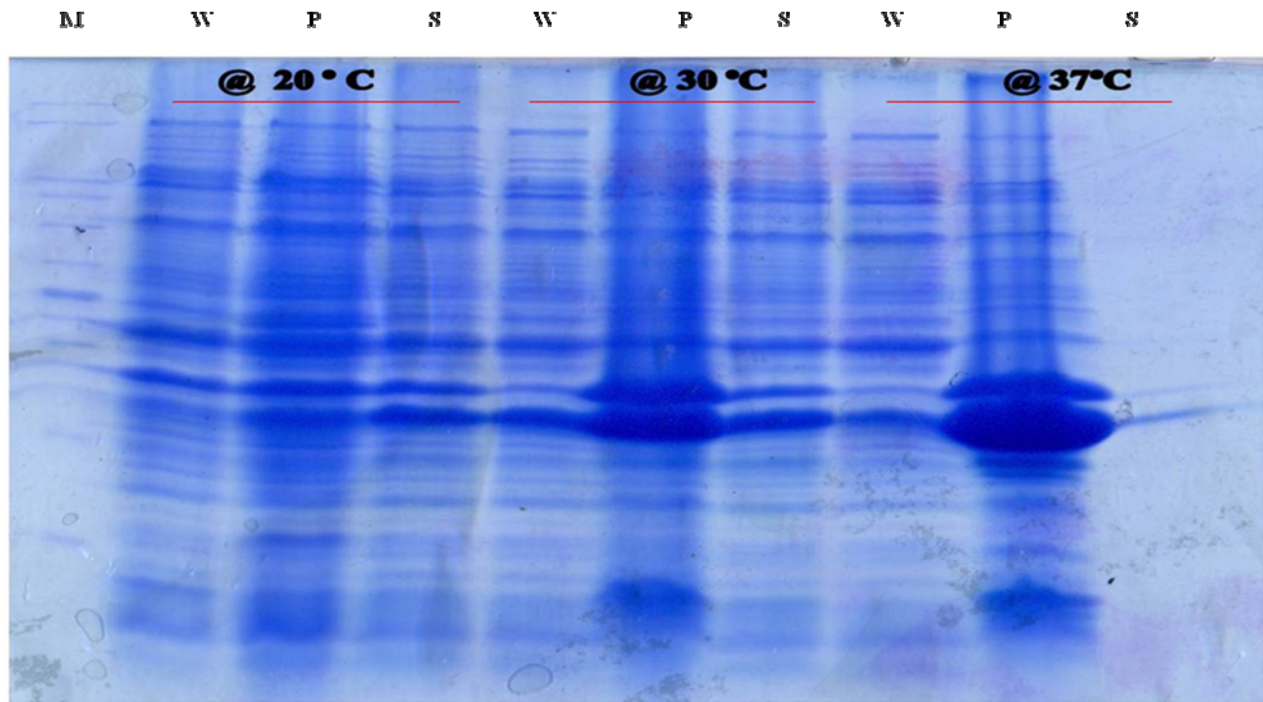

**Figure S2.** Expression of ToLCNDV-Rg-CP in *E. coli* at different concentrations of IPTG and incubation temperatures. Lane M: Protein marker; Lane 1: *E. coli* BL-21 cells; Lanes 2-7: Induction at 20 °C with IPTG at 0.0, 0.05, 0.1, 0.3, and 0.5 mM concentrations; Lanes 7-11: Induction at 30 °C with IPTG at 0.0, 0.05, 0.1, 0.3, and 0.5 mM concentrations; Lanes 12-16: Induction at 37 °C with IPTG at 0.0, 0.05, 0.1, 0.3, and 0.5 mM concentrations.

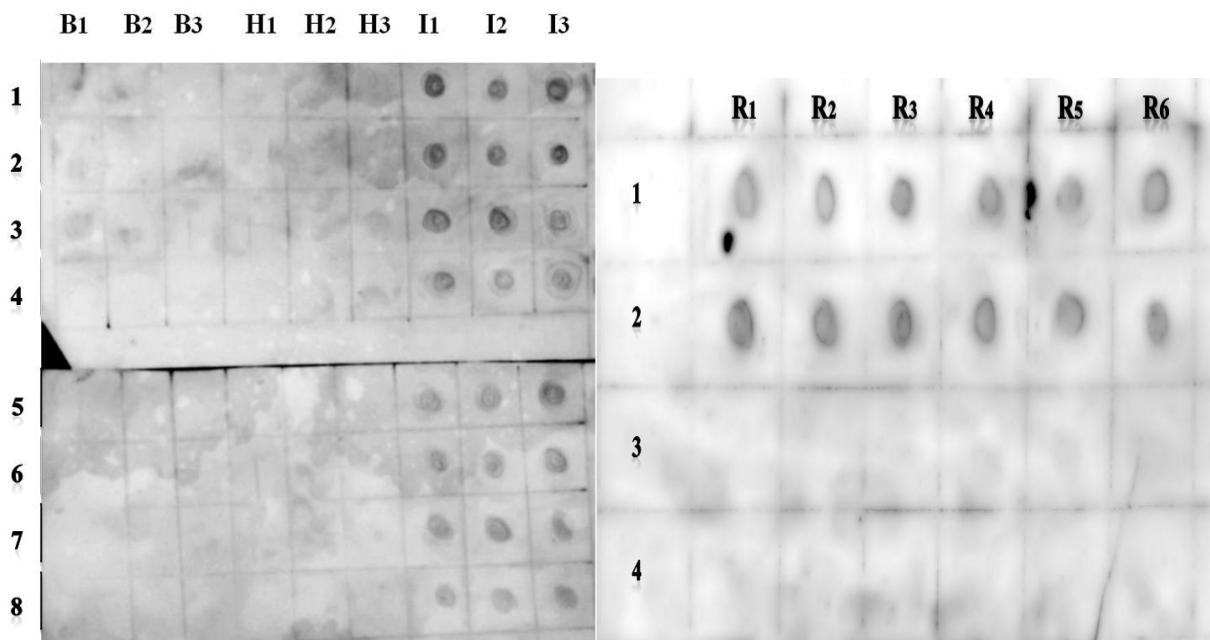

**Figure S3.** Dot immuno binding assay (DIBA) with different dilutions of ToLCNDV-Rg-CP-Pab tested with ToLCNDV-Rg-CP. a) B: Buffer control; H: Healthy control; I: Infected samples; Row 1: 1:100; Row 2: 1:500; Row 3: 1:1000; Row 4: 1:2000; Row 5: 1:4000; Row 6: 1:8000; Row 7: 1:10000; Row 8: 1:20000; b) Row 1: Recombinant protein; Row 2: Ridge gourd infected sample; Row 3: Ridge gourd healthy sample; Row 4: Negative control (Buffer); R1; R2; R3; R4; R5 and R6 are replications.

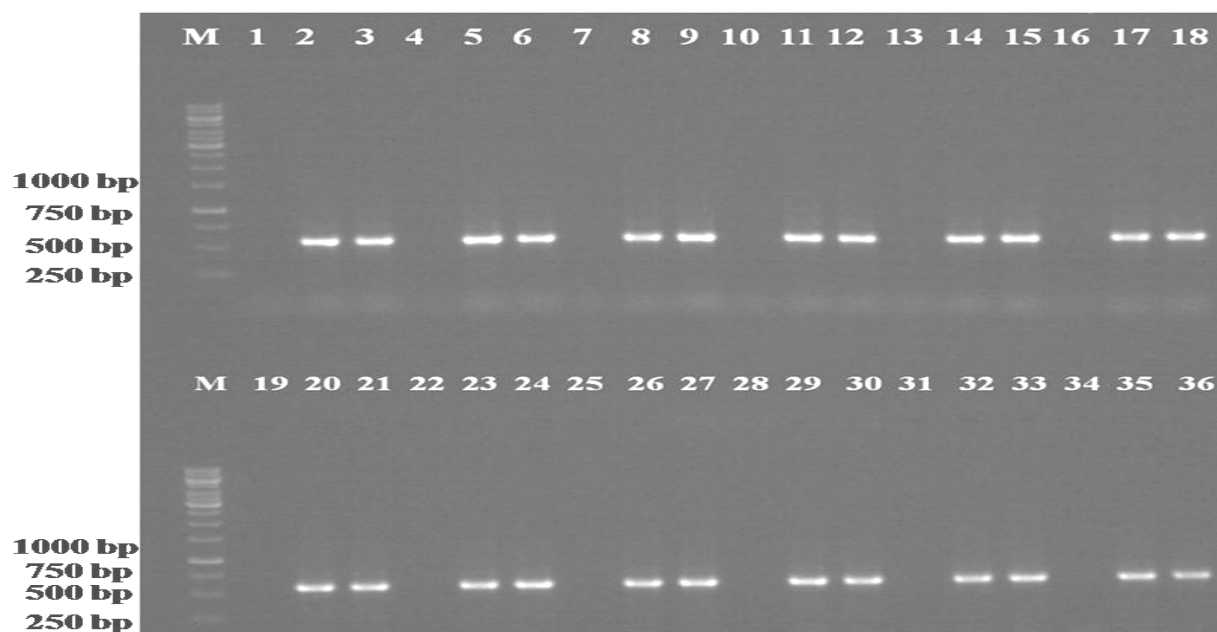

**Figure S4.** Agarose gel showing PCR amplification of core CP of begomoviruses from various infected host plants. M: 1 kb DNA marker; Lane 1:Healthy ridge gourd; Lane 2, 3:Infected ridge gourd; Lane 4:Healthy watermelon; Lane 5, 6 :Healthy watermelon; Lane 7: Healthy cucumber; Lane 8, 9:Infected cucumber; Lane 10 : Healthy pumpkin; Lane 11, 12 : Infected pumpkin; Lane 13:Healthy bitter gourd; Lane 14, 15 :Infected bitter gourd; Lane 16:Healthy bottle gourd; Lane 17, 18: Infected bottle gourd; Lane 19:Healthy sponge gourd; Lane 20, 21:Infected sponge gourd; Lane 22:Healthy tomato; Lane 23, 24:Infected tomato; Lane 25: Healthy chilli; Lane 26, 27: Infected chilli; Lane 28: Healthy capsicum; Lane 29, 30:Infected capsicum; Lane 31:Healthy cowpea; Lane 32, 33:Infected cowpea; Lane 34:Healthy beans; Lane 35, 36: Infected French bean.



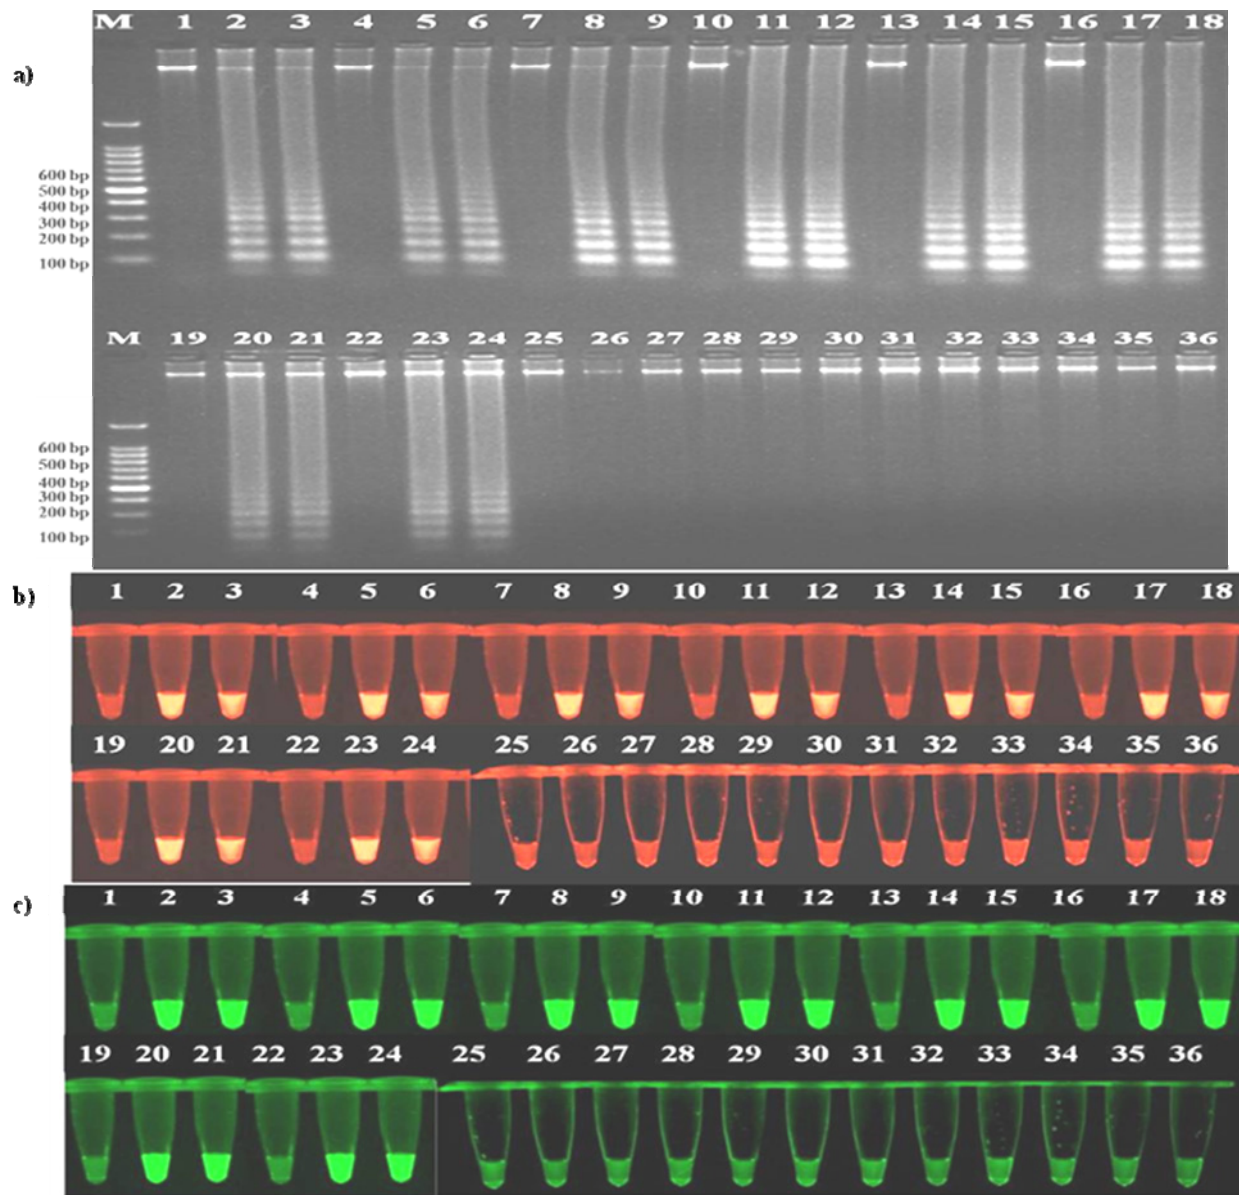

**Figure S5.** LAMP amplification of begomoviruses from various crops suspected to be infected with begomovirus and its visualization on a) 2 % agarose gel b), EtBr and c) VeriPCR dyes. M: 100bp DNA marker; Lane 1:Healthy ridge gourd; Lane 2, 3:Infected ridge gourd; Lane 4:Healthy watermelon; Lane 5, 6 :Infected watermelon; Lane 7:Healthy cucumber; Lane 8, 9 :Infected cucumber; Lane 10 :Healthy pumpkin; Lane 11, 12 :Infected pumpkin; Lane 13: Healthy bitter gourd; Lane 14, 15 :Infected bitter gourd; Lane 16: Healthy bottle gourd; Lane 17, 18: Infected bottle gourd; Lane 19:Healthy sponge gourd; Lane 20, 21:Infected sponge gourd; Lane 22:Healthy tomato; Lane 23, 24:Infected tomato; Lane 25:Healthy chilli; Lane 26, 27: Infected chilli; Lane 28:Healthy capsicum; Lane 29, 30:Infected capsicum; Lane 31:Healthy cowpea; Lane 32, 33:Infected cowpea; Lane 34:Healthy French bean; Lane 35, 36:Infected French bean.
